# Supplementary material for: Molecular Detection of Tick-Borne Bacterial and Protozoan Pathogens in Haemaphysalis longicornis (Acari: Ixodidae) Ticks from Free-Ranging Domestic Sheep in Hebei Province, China
Source: MDPI journal article supplement (doi:10.3390/pathogens12060763), 2023-05-26
Supplement: s1 [file s1]

Table S1. Primers for the amplification of sequences of ticks and tick-borne pathogens

| Organism          | PCR method      | Gene                  | Primer name     | Sequences                  | References |
|-------------------|-----------------|-----------------------|-----------------|----------------------------|------------|
| ticks             | nested PCR      | <i>COI</i>            | TCOIF1*         | GGAGCYCCWGATATAGCTTTCCC    | [55]       |
|                   |                 |                       | TCOIR1*         | CCTGGTAAAATTAAAATATAAACTTC |            |
|                   |                 |                       | TCOIF2#         | TTTTACCGCGATGAHTWTTYT      |            |
|                   |                 |                       | TCOIR2#         | WGGRTGRCCAAARAATCAAAATA    |            |
| <i>Rickettsia</i> | qPCR            | <i>rrs</i>            | R-rrs -F        | GGAGCATGCGGTTTAATTCTG      | [56]       |
|                   |                 |                       | R -rrs-R        | GCCATGCAACACCTGTGTGT       |            |
|                   |                 |                       | R -rrs-Probe    | VIC-CGGATCGCAGAGATG-MGB    |            |
|                   | semi-nested PCR | <i>rrs</i> fragment 1 | R-rrs1-147F*#   | GTACGGAATAACTTTTAGAAAT     | [57]       |
|                   |                 |                       | R-rrs1-1175R1*  | CATGATGACTTGACRTCGT        |            |
|                   |                 |                       | R-rrs1-1034R2#  | CATCTCACGACACGAGCTG        |            |
|                   |                 | <i>rrs</i> fragment 2 | R-rrs2-693F1*   | GAAGGCGRTCATYTRGGCT        |            |
|                   |                 |                       | R-rrs2-699F2#   | GRTCATYTRGGCTRCAACTG       |            |
|                   |                 |                       | R-rrs2-1427R*#  | CTGCCTCTTGCGTTAGCT         |            |
|                   | semi-nested PCR | <i>gltA</i>           | R-gltA-T151F1*  | CCGGGYTTTATGTCTACTGC       | [57]       |
|                   |                 |                       | R-gltA-T156F2#  | CTTTATGTCTACTGCKTCTTG      |            |
|                   |                 |                       | R-gltA-T1239R*# | AGCTGTCTWGGTCTGCTGATT      |            |
|                   | nested PCR      | 17kD                  | R-r17-F1*       | TTTACAAAATTCTAAAAACCAT     | [13]       |
|                   |                 |                       | R-r17k-R1*      | TCAATTCACAACCTTGCCATT      |            |
|                   |                 |                       | R-r17k-F2#      | GCTCTTGCAACTTCTATGTT       |            |
|                   |                 |                       | R-r17k-R2#      | TCAATTCACAACCTTGCCATT      |            |
|                   | Semi-nested PCR | <i>ompA</i>           | R-r190k-F*#     | TGGCGAATATTTCTCCAAAA       | [58,59]    |
|                   |                 |                       | R-r190k-R1*     | TGCATTTGTATTACCTATTGT      |            |
|                   |                 |                       | R-r190k-R2#     | AGTGCAGCATTCGCTCCCCCT      |            |

|                       |                 |                       |              |                                     |      |
|-----------------------|-----------------|-----------------------|--------------|-------------------------------------|------|
| Anaplasmataceae       | qPCR            | 23S rRNA              | Ana-F        | TGA CAG CGT ACC TTT TGC AT          | [60] |
|                       |                 |                       | Ana-R        | GTA ACA GGT TCG GTC CTC CA          |      |
|                       |                 |                       | Ana-Probe    | GGA TTA GAC CCG AAA CCA AG          |      |
| <i>Anaplasma</i> spp. | nested PCR      | <i>rrs</i>            | A&E-rrs-F1*  | GAA CGA ACG CTG GCG GCA AGC         | [61] |
|                       |                 |                       | A&E-rrs-R1*  | AGT A(T/C)C G(A/G)A CCA GAT AGC CGC |      |
|                       |                 |                       | A&E-rrs-F2#  | TGC ATA GGA ATC TAC CTA GTA G       |      |
|                       | semi-nested PCR | <i>rrs</i> fragment 1 | A&E-rrs-R2#  | CTA GGA ATT CCG CTA TCC TCT         | [62] |
|                       |                 |                       | ANAr1-F1*#   | GGATAGCCACTRGAARTGGTG               |      |
|                       |                 |                       | ANAr1-R1*    | CGTGCTGACTTGACATCAT                 |      |
|                       | semi-nested PCR | <i>rrs</i> fragment 2 | ANAr1-R2#    | CATCTCACGACACGAGCTG                 | [62] |
|                       |                 |                       | ANAr2-F1*    | CTGTCTGGTCCGGTACTGAC                |      |
|                       |                 |                       | ANAr2-F2#    | TGGTCCGGTACTGACRCT                  |      |
|                       | nested PCR      | <i>gltA</i>           | ANAr2-R1*#   | TGCCTCCTTDCGGTTGGC                  | [62] |
|                       |                 |                       | ACS-F1*      | GCGATTTTAGAGTGYGGAGATTG             |      |
|                       |                 |                       | ACS -R1*     | TACAATACCGGAGTAAAAGTCAA             |      |
| <i>A. bovis</i>       | Nested PCR      | <i>groEL</i>          | ACS-F2#      | GGGTTCMTGTCYACTGCTGCGTG             | [63] |
|                       |                 |                       | ACS -R2#     | TTGGATCGTARTTCTTGTAGACC             |      |
|                       |                 |                       | HS1-F*       | CGYCAGTGGGCTGGTAATGAA               |      |
|                       | semi-nested PCR | <i>groEL</i>          | HS6-R*       | CCWCCWGGTACWACACCTTC                | [64] |
|                       |                 |                       | HS3-F#       | ATAGTYATGAAGGAGAGTGAT               |      |
|                       |                 |                       | HSV-R#       | TCAACAGCAGCTCTAGTWG                 |      |
|                       | semi-nested PCR | <i>groEL</i>          | Ab gro-ELF1* | GTTCGCAGTATTTTGCCAGT                | [64] |
|                       |                 |                       | Ab gro-ELF2# | ATCTGGAAGRCCACTATTGAT               |      |
|                       |                 |                       | Ab gro-ELR*# | CTGCRTTCAGAGTCATAAATAC              |      |
| <i>A. capra</i>       | nested PCR      | <i>groEL</i>          | Ac gro-ELF1* | GCGAGGCGTTAGACAAGTCCATT             | [65] |
|                       |                 |                       | Ac gro-ELR3* | TCCAGAGATGCGAGCGTGATAG              |      |

|                           |                 |                       |                  |                                               |      |
|---------------------------|-----------------|-----------------------|------------------|-----------------------------------------------|------|
| <i>A. phagocytophilum</i> | semi-nested PCR | <i>groEL</i>          | Ac gro-ELF2#     | TGCACTGCTGGTCCAAAGGGGCT                       | [65] |
|                           |                 |                       | Ac gro-ELR2#     | CAACTTCGCTAGAGCCGCCAACC                       |      |
|                           |                 |                       | Ap&p gro-ELF*#   | ATGGTATGCAGTTTGATCGC                          |      |
|                           |                 |                       | Ap&p gro-ELR1*   | TCTACTCTGTCTTTGCGTTC                          |      |
|                           |                 |                       | Ap gro-ELR2#     | TTGAGTACAGCAACACCACCGGAA                      |      |
| <i>Ehrlichia</i> spp.     | semi-nested PCR | <i>rrs</i> fragment 1 | EHRrrs1-F1*#     | GAATAGCCATTAGAAATGATG                         | [62] |
|                           |                 |                       | EHRrrs1-R1*      | GTCAGTATCGAACCAGATAG                          |      |
|                           |                 |                       | EHRrrs1-R2#      | GTATCGAACCAGATAGCCG                           |      |
|                           |                 | <i>rrs</i> fragment 2 | EHRrrs2-F1*      | CGGCTATCTGGTTCGATAC                           |      |
|                           |                 |                       | EHRrrs2-F2#      | CTATCTGGTTCGATACTGAC                          |      |
|                           | nested PCR      | <i>gltA</i>           | EHRrrs2-R1*#     | GCTTCCTTKCGGTTAGCAC                           | [66] |
|                           |                 |                       | ECS-F1*          | TATGRTCRAAGAAGCAGTATT                         |      |
|                           |                 |                       | ECS-R1*          | GGAATATTAAC TTATGATCC                         |      |
|                           |                 |                       | ECS-F2#          | CTGACGTGGACGACATATCT                          |      |
|                           |                 |                       | ECS-R2#          | TGGGCTGGYAATGAAATTGA                          |      |
|                           | nested PCR      | <i>groEL</i>          | HS1-F*           | CGYCAGTGGGCTGGTAATGAA                         | [67] |
|                           |                 |                       | HS6-R*           | CCWCCWGGTACWACACCTTC                          |      |
|                           |                 |                       | GROEL-F#         | TGGCAAATGTAGTTGTAACAGG                        |      |
|                           | semi-nested PCR | <i>ftsZ</i>           | GROEL-R#         | GCCGACTTTTAGTACAGCAA                          | [68] |
|                           |                 |                       | Eh_ftsZ_703_R1*  | CWGCTTCTCCTGTRCCCATCAT                        |      |
|                           |                 |                       | Eh_ftsZ_313_F2#  | ACTGCYGGAATGGGTGGWGGA                         |      |
|                           | nested PCR      | conP28                | Eh_ftsZ_679_R2*# | TTTRCCCATYTCRCTCATTATTGC                      | [68] |
|                           |                 |                       | conP28-F1        | AT(C/T)AGT(G/C)AAA(A/G)TA(T/C)(A/G)T(G/A)CCAA |      |
|                           |                 |                       | conP28-R1        | TTA(G/A)AA(A/G)G(C/T)AAA(C/T)CT(T/G)CCTCC     |      |
|                           |                 |                       | conP28-F2        | CAATGG(A/G)(T/A)GG(T/C)CC(A/C)AGA(AG)TAG      |      |
|                           |                 |                       | conP28-R2        | TTCC(T/C)TG(A/G)TA(A/G)G(A/C)AA(T/G)TTTAGG    |      |

|                                          |            |               |                |                               |      |
|------------------------------------------|------------|---------------|----------------|-------------------------------|------|
| <i>Borrelia spp.</i>                     | PCR        | <i>dsb</i>    | Eh-dsb-330 F   | GATGATGTCTGAAGATATGAAACAAAT   | [69] |
|                                          |            |               | Eh-dsb-728 R   | CTGCTCGTCTATTTTACTTCTTAAAGT   |      |
|                                          | qPCR       | 23S rRNA      | Bo23S-F        | GAGTCTTAAAAGGGCGATTAGT        | [70] |
|                                          |            |               | Bo23S-R        | CTTCAGCCTGGCCATAAATAG         |      |
|                                          |            |               | Bo23S-Probe    | AGATGTGGTAGACCCGAAGCCGAGT     | [53] |
|                                          | nested PCR | <i>ospA</i>   | Bor-ospA-F1*   | GGGAATAGGTCTAATATTAGCC        |      |
|                                          |            |               | Bor-ospA-R1*   | CACTAATTGTTAAAGTGGAAGT        |      |
|                                          |            |               | Bor-ospA-F2#   | GCAAAATGTTAGCAGCCTTGAT        |      |
| <i>Francisella tularensis</i>            |            |               | Bor-ospA-R2#   | CTGTGTATTCAAGTCTGGC           | [70] |
|                                          | qPCR       | <i>fopA</i>   | Fr-fopA-F      | GGCAAATCTAGCAGGTCAAGC         |      |
|                                          |            |               | Fr-fopA-R      | CAACACTTGCTTGAACATTCTAG       |      |
|                                          |            |               | Fr-fopA-Probe  | AACAGGTGCTTGGGATGTGGGTGGTG    |      |
| <i>Coxiella burnetii</i>                 | qPCR       | <i>IS1111</i> | Co-IS111-F     | TGGAGGAGCGAACCATTGGT          | [70] |
|                                          |            |               | Co-IS111-R     | CATACGGTTTGACGTGCTGC          |      |
|                                          |            |               | Co-IS111-Probe | ATCGGACGTTTATGGGGATGGGTATCC   |      |
| <i>Bartonella</i>                        | qPCR       | <i>ssrA</i>   | Bar-ssrA-F     | GCTATGGTAATAAATGGACAATGAAATAA | [71] |
|                                          |            |               | Bar-ssrA-R     | GCTTCTGTTGCCAGGTG             |      |
|                                          |            |               | Bar-ssrA-Probe | ACCCCGCTTAAACCTGCGACG         |      |
| <i>Babesia–Theileria–<br/>Hepatozoon</i> | nested PCR | 18S rRNA      | BTH18S-F1*     | GTGAAACTGCGAATGGCTCATTAC      | [33] |
|                                          |            |               | BTH18S-R1*     | AAGTGATAAGGTTACAAAACTTCCC     |      |
|                                          |            |               | BTH18S- F2#    | GGCTCATTACAACAGTTATAGTTTATTG  |      |
|                                          |            |               | BTH18S- R2#    | CGGTCCGAATAATTCACCGGAT        |      |

\*Primers using in first round of nested PCR or semi-nested PCR

# Primers using in second round of nested PCR or semi-nested PCR
